# Supplementary material for: Decreased ribosomal DNA transcription in dorsal raphe nucleus neurons differentiates between suicidal and non-suicidal death
Source: PubMed Central journal article supplement (PMC4819736; doi:10.1007/s00406-015-0655-4), 2015-11-21
Supplement: 406_2015_655_MOESM1_ESM.pdf [file 406_2015_655_MOESM1_ESM.pdf]

## Decreased ribosomal DNA transcription in dorsal raphe nucleus neurons differentiates between suicidal and non-suicidal death

Marta Krzyżanowska, Johann Steiner, Karol Karnecki, Michał Kaliszan, Ralf Brisch, Marek Wiergowski, Katharina Braun, Zbigniew Jankowski, Tomasz Gos

### European Archives of Psychiatry and Clinical Neuroscience

Corresponding author:

Tomasz Gos, MD

Department of Forensic Medicine

Medical University of Gdańsk

ul. Dębowa 23

80-204 Gdańsk, Poland

E-mail: [gost@gumed.edu.pl](mailto:gost@gumed.edu.pl)

**Supplementary Table** Detailed diagnostic and demographic data and the values of parameters revealed by AgNOR staining in dorsal raphe nucleus neurons in suicide victims (n=27) and control subjects (n=30).

*Abbreviations:* f – female; m – male; q1 and q3 – quartile 1 and 3; PMI – postmortem interval; BAC – blood alcohol concentration; LOQ – limit of quantification (BAC = 0.2 g/l).

| Case ID         | Cause of death | Sex | Age [yr] | PMI [h] | BAC [g/l] | Nuclear area ( $\mu\text{m}^2$ ) | AgNOR area ( $\mu\text{m}^2$ ) | AgNOR number | Relative AgNOR area |
|-----------------|----------------|-----|----------|---------|-----------|----------------------------------|--------------------------------|--------------|---------------------|
| SUICIDE VICTIMS |                |     |          |         |           |                                  |                                |              |                     |
| 1               | Hanging        | m   | 47       | 24      | 3.3       | 120.034                          | 9.261                          | 1.000        | 0.078               |
| 2               | Hanging        | m   | 30       | 24      | <LOQ      | 125.198                          | 10.201                         | 1.028        | 0.082               |
| 3               | Hanging        | m   | 45       | 24      | 0.9       | 101.807                          | 9.367                          | 1.000        | 0.091               |
| 4               | Hanging        | m   | 48       | 48      | <LOQ      | 105.120                          | 8.501                          | 1.033        | 0.080               |
| 5               | Hanging        | m   | 43       | 24      | 2.1       | 89.652                           | 6.765                          | 1.020        | 0.076               |

|    |                                                             |   |    |     |      |         |        |       |       |
|----|-------------------------------------------------------------|---|----|-----|------|---------|--------|-------|-------|
| 6  | Hanging                                                     | f | 46 | 24  | 3.4  | 117.425 | 11.942 | 1.022 | 0.101 |
| 7  | Hanging                                                     | m | 57 | 24  | <LOQ | 134.127 | 11.669 | 1.042 | 0.089 |
| 8  | Hanging                                                     | m | 54 | 24  | <LOQ | 127.415 | 10.468 | 1.000 | 0.083 |
| 9  | Hanging                                                     | m | 23 | 24  | <LOQ | 104.996 | 9.135  | 1.007 | 0.089 |
| 10 | Hanging                                                     | m | 55 | 70  | 1.3  | 113.885 | 9.524  | 1.011 | 0.085 |
| 11 | Hanging                                                     | m | 23 | 24  | 1.0  | 103.747 | 9.350  | 1.000 | 0.092 |
| 12 | Hanging                                                     | f | 55 | 24  | <LOQ | 123.251 | 10.534 | 1.000 | 0.086 |
| 13 | Hanging                                                     | m | 27 | 72  | <LOQ | 132.076 | 11.552 | 1.019 | 0.089 |
| 14 | Hanging                                                     | m | 43 | 24  | 3.3  | 141.411 | 12.332 | 1.000 | 0.086 |
| 15 | Hanging                                                     | m | 44 | 48  | <LOQ | 123.324 | 10.335 | 1.000 | 0.086 |
| 16 | Hanging                                                     | m | 29 | 120 | <LOQ | 99.515  | 9.790  | 1.000 | 0.101 |
| 17 | Hanging                                                     | m | 27 | 96  | 2.2  | 97.269  | 9.648  | 1.000 | 0.100 |
| 18 | Hanging                                                     | m | 27 | 48  | 2.5  | 113.196 | 11.522 | 1.000 | 0.103 |
| 19 | Fall from building                                          | m | 28 | 41  | <LOQ | 160.715 | 13.131 | 1.066 | 0.082 |
| 20 | Fall from building                                          | f | 27 | 33  | <LOQ | 148.822 | 11.049 | 1.000 | 0.076 |
| 21 | Self-harm by sharp object (cut wound of neck)               | m | 77 | 48  | <LOQ | 134.041 | 10.411 | 1.000 | 0.079 |
| 22 | Self-harm by sharp object (multiple cut wounds of forearms) | m | 61 | 96  | <LOQ | 119.967 | 9.975  | 1.000 | 0.086 |
| 23 | Self-harm by handgun discharge (gunshot wound of thigh)     | m | 50 | 24  | 2.13 | 126.784 | 12.864 | 1.000 | 0.102 |
| 24 | Self-poisoning by Midazolam                                 | m | 36 | 24  | <LOQ | 106.042 | 8.488  | 1.075 | 0.080 |
| 25 | Self-poisoning by Amitriptyline                             | f | 39 | 72  | <LOQ | 116.020 | 10.068 | 1.000 | 0.090 |
| 26 | Self-poisoning by Carbamazepine                             | m | 53 | 2   | <LOQ | 114.041 | 11.674 | 1.000 | 0.103 |

|                                               |                                          |               |                    |                    |                       |                                   |                              |                             |                             |
|-----------------------------------------------|------------------------------------------|---------------|--------------------|--------------------|-----------------------|-----------------------------------|------------------------------|-----------------------------|-----------------------------|
| 27                                            | Self-poisoning by helium inhalation      | m             | 29                 | 24                 | <LOQ                  | 109.008                           | 8.685                        | 1.014                       | 0.081                       |
| <i>Suicide victims: ratio/median (q1, q3)</i> |                                          | <i>23m/4f</i> | <i>43 (28, 53)</i> | <i>24 (24, 48)</i> | <i>0.0 (0.0, 2.1)</i> | <i>117.425 (105.715, 127.415)</i> | <i>10.201(9.349, 11.552)</i> | <i>1.000 (1.000, 1.019)</i> | <i>0.086 (0.081, 0.092)</i> |
| CONTROLS                                      |                                          |               |                    |                    |                       |                                   |                              |                             |                             |
| 28                                            | Coronary failure                         | m             | 47                 | 24                 | <LOQ                  | 96.067                            | 14.572                       | 1.012                       | 0.137                       |
| 29                                            | Coronary failure                         | m             | 63                 | 48                 | <LOQ                  | 114.122                           | 12.370                       | 1.000                       | 0.102                       |
| 30                                            | Coronary failure                         | f             | 61                 | 8                  | <LOQ                  | 145.418                           | 14.784                       | 0.998                       | 0.101                       |
| 31                                            | Coronary failure                         | f             | 61                 | 24                 | <LOQ                  | 126.208                           | 10.121                       | 1.000                       | 0.081                       |
| 32                                            | Coronary failure                         | f             | 65                 | 24                 | <LOQ                  | 144.607                           | 12.114                       | 1.000                       | 0.084                       |
| 33                                            | Coronary failure                         | f             | 61                 | 24                 | <LOQ                  | 127.506                           | 13.631                       | 1.000                       | 0.101                       |
| 34                                            | Acute myocardial infarction              | m             | 47                 | 24                 | <LOQ                  | 95.494                            | 11.443                       | 1.000                       | 0.117                       |
| 35                                            | Acute myocardial infarction              | m             | 40                 | 96                 | <LOQ                  | 95.971                            | 9.690                        | 1.018                       | 0.098                       |
| 36                                            | Acute myocardial infarction              | f             | 64                 | 26                 | <LOQ                  | 108.399                           | 11.516                       | 1.000                       | 0.101                       |
| 37                                            | Acute myocardial infarction              | f             | 63                 | 24                 | <LOQ                  | 99.037                            | 12.429                       | 1.000                       | 0.120                       |
| 38                                            | Acute myocardial infarction              | f             | 39                 | 48                 | <LOQ                  | 135.098                           | 14.248                       | 1.067                       | 0.103                       |
| 39                                            | Pulmonary embolism (acute cor pulmonale) | f             | 48                 | 26                 | <LOQ                  | 100.086                           | 10.803                       | 1.000                       | 0.103                       |
| 40                                            | Pulmonary embolism (acute cor pulmonale) | f             | 30                 | 48                 | <LOQ                  | 117.920                           | 12.386                       | 0.997                       | 0.098                       |
| 41                                            | Pulmonary embolism (acute cor pulmonale) | m             | 56                 | 24                 | <LOQ                  | 102.774                           | 10.619                       | 1.000                       | 0.100                       |
| 42                                            | Pulmonary embolism (acute cor pulmonale) | m             | 54                 | 24                 | <LOQ                  | 145.587                           | 11.683                       | 1.078                       | 0.086                       |
| 43                                            | Pulmonary embolism (acute cor pulmonale) | f             | 48                 | 48                 | <LOQ                  | 83.807                            | 9.513                        | 1.000                       | 0.108                       |
| 44                                            | Sudden cardiac death                     | f             | 33                 | 72                 | <LOQ                  | 110.280                           | 11.101                       | 1.000                       | 0.100                       |
| 45                                            | Sudden cardiac death                     | f             | 38                 | 24                 | <LOQ                  | 113.116                           | 12.182                       | 1.022                       | 0.102                       |

|                                        |                                    |                 |                    |                    |                       |                                   |                                |                             |                             |
|----------------------------------------|------------------------------------|-----------------|--------------------|--------------------|-----------------------|-----------------------------------|--------------------------------|-----------------------------|-----------------------------|
| 46                                     | Sudden cardiac death               | f               | 67                 | 24                 | <LOQ                  | 101.426                           | 13.049                         | 1.000                       | 0.119                       |
| 47                                     | Sudden cardiac death               | f               | 39                 | 24                 | <LOQ                  | 107.360                           | 11.160                         | 1.039                       | 0.104                       |
| 48                                     | Sudden cardiac death               | f               | 66                 | 24                 | <LOQ                  | 118.046                           | 13.830                         | 1.006                       | 0.114                       |
| 49                                     | Ruptured abdominal aortic aneurysm | m               | 56                 | 48                 | <LOQ                  | 92.627                            | 12.336                         | 1.026                       | 0.128                       |
| 50                                     | Ruptured abdominal aortic aneurysm | m               | 64                 | 35                 | <LOQ                  | 138.556                           | 13.846                         | 1.000                       | 0.094                       |
| 51                                     | Ruptured abdominal aortic aneurysm | f               | 50                 | 72                 | <LOQ                  | 101.756                           | 12.072                         | 1.000                       | 0.115                       |
| 52                                     | Stabbed (open wounds of thorax)    | m               | 47                 | 48                 | <LOQ                  | 130.319                           | 13.178                         | 1.000                       | 0.101                       |
| 53                                     | Stabbed (open wound of thorax)     | m               | 28                 | 7                  | 4.12                  | 111.798                           | 12.396                         | 1.013                       | 0.111                       |
| 54                                     | Accidental fall from building      | f               | 24                 | 48                 | 2.93                  | 137.625                           | 13.563                         | 1.000                       | 0.098                       |
| 55                                     | Injury of cervical spinal cord     | f               | 19                 | 20                 | <LOQ                  | 126.908                           | 12.294                         | 1.000                       | 0.097                       |
| 56                                     | Choked on food                     | m               | 23                 | 48                 | <LOQ                  | 125.267                           | 12.632                         | 1.000                       | 0.103                       |
| 57                                     | Subarachnoid haemorrhage           | f               | 39                 | 48                 | <LOQ                  | 116.472                           | 11.511                         | 1.000                       | 0.099                       |
| <i>Controls: ratio/median (q1, q3)</i> |                                    | <i>11m/19f</i>  | <i>48 (39, 61)</i> | <i>24 (24, 48)</i> | <i>0.0 (0.0, 0.0)</i> | <i>113.619 (101.426, 127.506)</i> | <i>12.315 (11.443, 13.178)</i> | <i>1.000 (1.000, 1.012)</i> | <i>0.102 (0.099, 0.113)</i> |
| Statistics                             | test                               | $\chi^2$ -test  | U                  | U                  | U                     | U                                 | U                              | U                           | U                           |
|                                        | characteristic value               | $\chi^2= 13.90$ | Z = 1.886          | Z = -0.280         | Z = 1.846             | Z = 0.679                         | Z = -4.275                     | Z = 1.103                   | Z = -4.515                  |
|                                        | P value                            | <b>0.0002</b>   | 0.059              | 0.780              | 0.065                 | 0.499                             | <b>0.000007</b>                | 0.336                       | <b>0.000002</b>             |
